# Supplementary material for: Characterization of Solanum melongena Thioesterases Related to Tomato Methylketone Synthase 2
Source: MDPI journal article supplement (doi:10.3390/genes10070549), 2019-07-18
Supplement: s1 [file s1]

**Supplemental Table 1. Synthetic oligonucleotide used in this study**

Restriction sites on primers are underlined and primer overhangs are in bold. Start codons are in blue and stop codons in red. “Truncated” refers to the ORF without the transit peptide coding region. A brief description of what each primer was used for is provided.

| <b>Primers for isolation and cloning of full-length SmMKS2 cDNAs</b> |                                                   |                                           |
|----------------------------------------------------------------------|---------------------------------------------------|-------------------------------------------|
| Primer name                                                          | Primer sequence (5'→3')                           | Brief description                         |
| SmMKS2-1-F                                                           | <b><u>CCATGG</u></b> ATGTCACAATCCCTAGGA           | 5' primer for full-length <i>SmMKS2-1</i> |
| SmMKS2-1-f/t-R                                                       | <b><u>CTCGAG</u></b> TTAGTTAGATGCCTTCTGG          | 3' primer for full-length <i>SmMKS2-1</i> |
| SmMKS2-2-F                                                           | CCAATGTTTCCAATCTAGTAGC                            | 5' primer for full-length <i>SmMKS2-2</i> |
| SmMKS2-2-f/t-R                                                       | <b><u>CTCGAG</u></b> TACTTCAATGCCTCCTG            | 3' primer for full-length <i>SmMKS2-2</i> |
| SmMKS2-3-F                                                           | <b><u>AAGCTT</u></b> AATGTCTCGGTCCCCTTTG          | 5' primer for full-length <i>SmMKS2-3</i> |
| SmMKS2-3-R                                                           | <b><u>GGATCC</u></b> ACTAATTTTGATCTGATTTC<br>TGAC | 3' primer for full-length <i>SmMKS2-3</i> |
| <b>Primers for heterologous protein expression in <i>E. coli</i></b> |                                                   |                                           |
| SmMKS2-1-t-F                                                         | <b><u>CATATG</u></b> GGTGAGTTTCATGA               | 5' primer for truncated <i>SmMKS2-1</i>   |
| SmMKS2-1-f/t-R                                                       | <b><u>CTCGAG</u></b> TTAGTTAGATGCCTTCTGG          | 3' primer for truncated <i>SmMKS2-1</i>   |
| SmMKS2-2-t-F                                                         | <b><u>CATATG</u></b> GGTCAGTTCTATGAAA             | 5' primer for truncated <i>SmMKS2-2</i>   |
| SmMKS2-2-f/t-R                                                       | <b><u>CTCGAG</u></b> TACTTCAATGCCTCCTG            | 3' primer for truncated <i>SmMKS2-2</i>   |
| SmMKS2-3-t-F                                                         | <b><u>CATATG</u></b> GGTGAGTTTCATGAAGTTG          | 5' primer for truncated <i>SmMKS2-3</i>   |

|                                                   |                                          |                                                                  |
|---------------------------------------------------|------------------------------------------|------------------------------------------------------------------|
| SmMKS2-3-t-R                                      | <b><u>CTCGAGT</u></b> CACGACGAACCTATCTCC | 3' primer for truncated <i>SmMKS2-3</i>                          |
| <b>qRT-PCR primers for real-time PCR analysis</b> |                                          |                                                                  |
| APRT-qF                                           | TGGTTGCAGGTGTGGAAG                       | 5' primer for <i>APRT</i> qRT-PCR                                |
| APRT-qR                                           | GGTAGCTTCTTAGGTTTCCTC                    | 5' primer for <i>APRT</i> qRT-PCR                                |
| SmMKS2-1-qF                                       | CCAGATCAAGAGCCAATC                       | 5' primer for <i>SmMKS2-1</i> qRT-PCR                            |
| SmMKS2-1-qR                                       | AATTTCGATCTGAACTCTGG                     | 3' primer for <i>SmMKS2-1</i> qRT-PCR                            |
| SmMKS2-2-qF                                       | CTTCCAAATCAAGAGCCTG                      | 5' primer for <i>SmMKS2-2</i> qRT-PCR                            |
| SmMKS2-2-qR                                       | GCAATTTTAATTTGACCTCTGA                   | 3' primer for <i>SmMKS2-2</i> qRT-PCR                            |
| SmMKS2-3-qF                                       | ATCCCTCTCCGGCAACTC                       | 5' primer for <i>SmMKS2-3</i> qRT-PCR                            |
| SmMKS2-3-qR                                       | CATGAAACTCACCCATTCTTTG                   | 3' primer for <i>SmMKS2-3</i> qRT-PCR                            |
| <b>Primers for isolation of genomic sequences</b> |                                          |                                                                  |
| gSmMKS2-1-F1                                      | <b><u>CCATGG</u></b> ATGTCACAATCCCTAGGA  | 5' primer for partial <i>SmMKS2-1</i> (1 <sup>st</sup> fragment) |
| gSmMKS2-1-R1                                      | GGAGTAACTAGCAAGATCTGA                    | 3' primer for partial <i>SmMKS2-1</i> (1 <sup>st</sup> fragment) |
| gSmMKS2-1-F2                                      | CCAGTTTCCAATGTAATAAGC                    | 5' primer for partial <i>SmMKS2-1</i> (2 <sup>nd</sup> fragment) |
| gSmMKS2-1-R2                                      | GGAGCTAGATACTTAAGTGACA                   | 3' primer for partial <i>SmMKS2-1</i> (2 <sup>nd</sup> fragment) |
| gSmMKS2-1-F3                                      | CATAAGTGCTGATGAAGTG                      | 5' primer for partial <i>SmMKS2-1</i> (3 <sup>rd</sup> fragment) |

|              |                                          |                                                                     |
|--------------|------------------------------------------|---------------------------------------------------------------------|
| gSmMKS2-1-R3 | <b><u>CTCGAG</u></b> TTAGTTAGATGCCTTCTGG | 3' primer for partial<br><i>SmMKS2-1</i> (3 <sup>rd</sup> fragment) |
| gSmMKS2-2-F1 | CCAATGTTTCCAATCTAGTAGC                   | 5' primer for partial<br><i>SmMKS2-2</i> (1 <sup>st</sup> fragment) |
| gSmMKS2-2-R1 | CTTACGAGATCACCTTAAGACAC                  | 3' primer for partial<br><i>SmMKS2-2</i> (1 <sup>st</sup> fragment) |
| gSmMKS2-2-F2 | ACAATGTTAAGCTAGAGTGCC                    | 5' primer for partial<br><i>SmMKS2-2</i> (2 <sup>nd</sup> fragment) |
| gSmMKS2-2-R2 | GCGTACTACTTCATCAGCAC                     | 3' primer for partial<br><i>SmMKS2-2</i> (2 <sup>nd</sup> fragment) |
| gSmMKS2-3-F3 | ATGGCTTACATTTCTCTCC                      | 5' primer for partial<br><i>SmMKS2-1</i> (3 <sup>rd</sup> fragment) |
| gSmMKS2-3-R3 | ATGAACAAAGCTCTTCTGG                      | 3' primer for partial<br><i>SmMKS2-1</i> (3 <sup>rd</sup> fragment) |
| gSmMKS2-3-F1 | ATGTCTCGGTCCCCTTGATTG                    | 5' primer for partial<br><i>SmMKS2-3</i> (1 <sup>st</sup> fragment) |
| gSmMKS2-3-R1 | CGAGGATCTTAATGATGTACATGC                 | 3' primer for partial<br><i>SmMKS2-3</i> (1 <sup>st</sup> fragment) |
| gSmMKS2-3-F2 | GGCATAAGTGTTGATGAAGTGG                   | 5' primer for partial<br><i>SmMKS2-3</i> (2 <sup>nd</sup> fragment) |
| gSmMKS2-3-R2 | CCAAGCGATAATAATGGAGGTAAC                 | 3' primer for partial<br><i>SmMKS2-3</i> (2 <sup>nd</sup> fragment) |
